# Supplementary material
Source: Springer Nature journal article supplement (https://www.springermedizin.de/resource/supplementary/12875_2012_775_MOESM2_ESM.pdf/9435128)
Supplement: MOESM2 [file 9435128]

## **1. Introduction**

- Introduce yourself and explain the principles of case management

*Materials:* Patient Information Leaflet

## **2. Conducting the Assessment**

- Assess how the patient's health is impacting on their life using the standardised assessment form.

*Materials:* Patient Assessment Document (for case manager)

## **3. Devising the personal health plan**

- record problems, professionals currently involved, actions to take
- agree and set review date for each problem.

*Materials:* Personalised Health Plan

## **4. Goal Setting (if required by the patient)**

- Help the patient to identify a problem to address. Use goal setting to help them 'break down' the problem into manageable parts.
- Introduce Personalised Health Plan; patient to record up to 3 goals

*Materials:* Personalised Health Plan, Goal Setting Information Leaflet

## **4. Action Planning (if required by the patient)**

- Help the patient to plan how to achieve each goal.
- Patient to record: what they will do, how they will do it, where they will do it, when they will do it, and with whom they will do it

*Materials:* Personalised Health Plan

## **5. Providing Information**

- Provide individualised self management resources

*Materials:* Lists of self management resources

## **6. Building Self-Efficacy**

- Ensure patient feels confident that they can achieve their goals.
- Discuss barriers to success and ways to overcome. Patient to record reasons to expect success.

## **7. Deciding a review date**

Record preferred contact details and date for review

## **8. Encouraging self monitoring**

Patient to record successes and difficulties in pursuing goals

## **9. Confirming Confidentiality**

Increase trust by signing the confidentiality agreement
